# Supplementary material for: Extended C termini of CPC-LIKE MYB proteins confer functional diversity inArabidopsisepidermal cell differentiation
Source: Oxford University Press journal article supplement (doi:10.1242/dev.149542), 2017-07-01
Supplement: dev149542supp.pdf [file dev149542supp.pdf]

Table S1. Primers used in this study

| Primer       | Sequence (5' to 3')                    |
|--------------|----------------------------------------|
| TW1165       | ATATGGTACCAATAAAAAATAAATCAC            |
| TW1166       | TGCTTGTCGACTGTATACTAA                  |
| TW1169       | ATATGGTACCACTTCATGTTCTTCCCTT           |
| TW1170       | ATATGTCGACAAGCCAATACATATCCA            |
| RT67         | ATATGTCGACAGAAACTCACTCACTATTACATC      |
| RT68         | ATATCCCGGGACGTAATTGAGATCTTCGATGATTC    |
| RT69         | ATATGTCGACGCTAGCTCATAAACGTTGGTACG      |
| RT70         | ATATGATATCCAATTTTAGATTTTCTTGGAGATTAAG  |
| RT89         | ATATGTCGACCTCAATATATCAAATTCAAACATTCA   |
| RT90         | ATATCCCGGGGGAAGGATAGATAGAAAAGCGAG      |
| RT91         | ATATGGATCCGTTGGACATTTCTTCTCTCTC        |
| RT92         | ATATGTCGACCTAACCGCATGGATTAAAGTTG       |
| RT296        | ATGAATACGCAGCGTAAGTCGAAG               |
| RT297        | ATATGAGCTC ATGGATAATA CCAACCGTCT TCGTC |
| RT299        | ATATGAGCTCATGGATAACACTGACCGTCGTC       |
| RT320        | ATTAAGACGT CGTCGTTTGT GAGAA            |
| RT321        | GATATCCACC ATTTACGAAC GATAGC           |
| CF2_NOterSma | TATACCCGGGCTGCAGGATTCTCA               |
| CPC-F        | GGATGTATAAACTCGTTGGCGACAG              |
| CPC-R        | GCCGTGTTTCATAAGCCAATATCTC              |
| TRY-F        | TGTACAGACTTGTCGGTGATAGGTG              |
| TRY-R        | GAGTGAAGCTGGCGTCGTTTA                  |
| ETC1-F       | CGAAGCATCTTAAGACCAATCCAAC              |
| ETC1-R       | CCGACAAGCTTATACATCCTGCAA               |
| ETC2-F       | CGGTCCCAGTCTTAGGCAAAC                  |
| ETC2-R       | ACCGACAAGTCTGTACATTCGAGAG              |
| GFP-F        | CAGTCCGCCCTGAGCAAAGAC                  |
| GFP-R        | CCCTTGCTCACCATGGACTTGTA                |
| Act2-F       | CTGGATCGGTGGTTCCATTC                   |
| Act2-R       | CCTGGACCTGCCTCATCATAC                  |

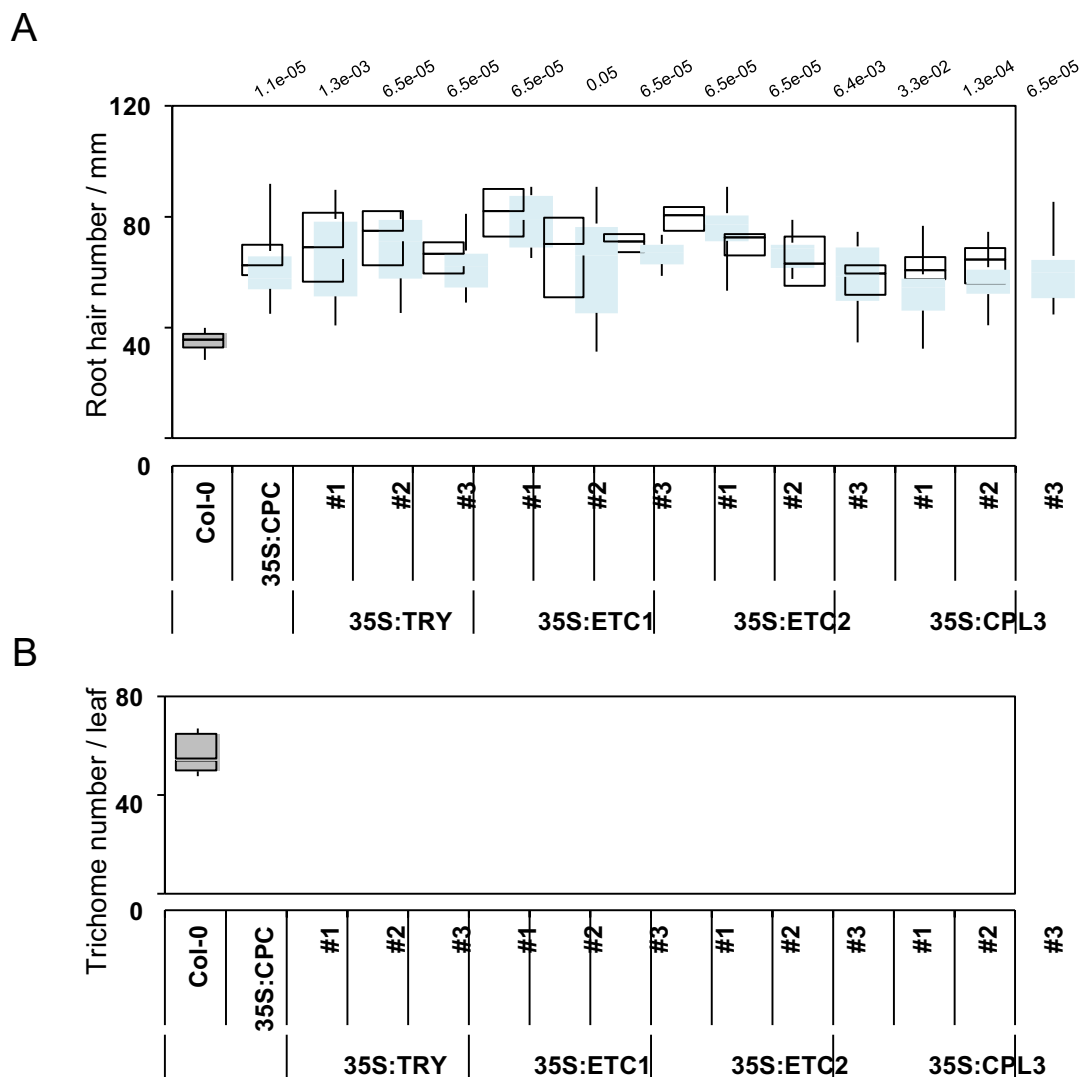

**Fig. S1 Epidermal phenotypes of 35S:CPC, 35S:TRY, 35S:ETC1, 35S:ETC2 and 35S:CPL3 transgenic plants.**

(A) Box-whisker plots showing root hair formation in five-day-old *Arabidopsis* seedlings of the wild-type Col-0 and 35S:CPC-like MYB transgenic plants. The number of root hairs per mm was determined from ten five-day-old seedlings from each line. p-values between the wild-type Col-0 and the transgenic lines were given above the boxes ( $n=10$ ). (B) Box-whisker plot showing trichome formation on two-week-old *Arabidopsis* third leaves of the wild-type Col-0 and 35S:CPC-like MYB transgenic plants. The number of trichomes per leaf was determined from five two-week-old third leaves from each line ( $n=5$ ). No trichome formation was observed on the two-week-old third leaves for any of the transgenic lines. The 35S:CPC line was described previously (Wada et al., 1997). The 35S:TRY lines were similar to the 35S:TRY line reported by Schellmann et al., (Schellmann et al., 2002). The 35S:ETC1 lines were similar to the 35S:ETC1-1 and 35S:ETC1-2 lines reported by Kirik et al., (Kirik et al., 2004a). The 35S:ETC2 lines were similar to the 35S:ETC2 line reported by Kirik et al., (Kirik et al., 2004b). The 35S:CPL3 lines were described previously (Tominaga et al., 2008).

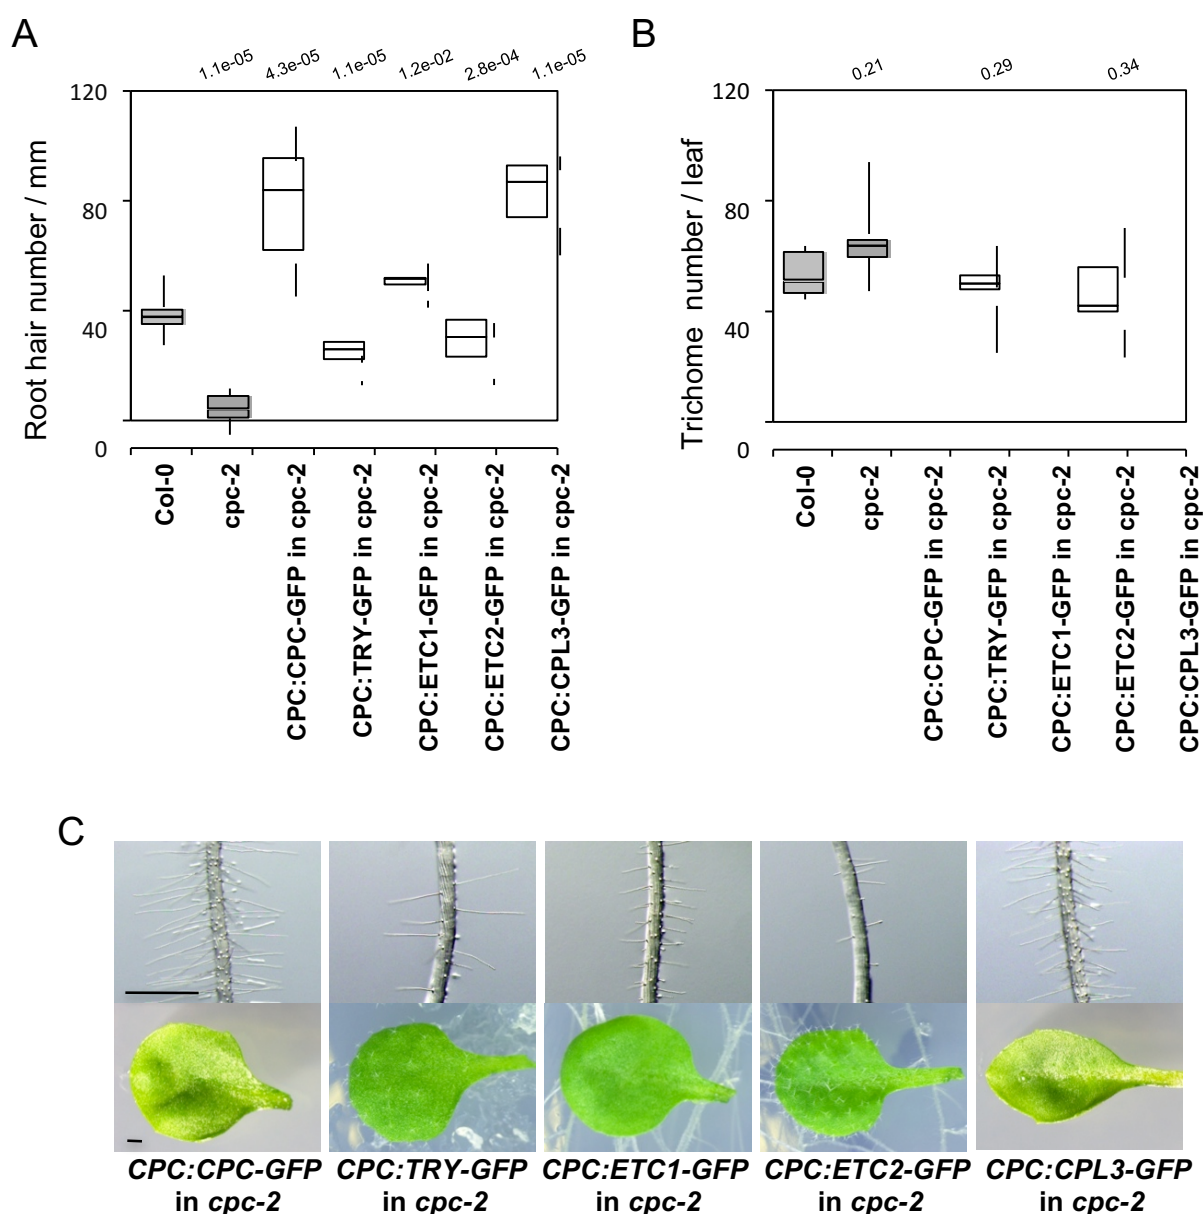

**Fig. S2. Epidermal phenotypes of *Arabidopsis cpc-2* mutant expressing *CPC:CPC-GFP*, *CPC:TRY-GFP*, *CPC:ETC1-GFP*, *CPC:ETC2-GFP* and *CPC:CPL3-GFP*.**

(A) Box-whisker plots showing root hair formation in five-day-old *Arabidopsis* seedlings of the wild-type Col-0, *cpc-2* mutant and *CPC:CPC-like MYB-GFP* in *cpc-2* transgenic *Arabidopsis* plants (shown in panel C) ( $n=10$ ). (B) Box-whisker plots showing trichome formation on two-week-old *Arabidopsis* third leaves of the wild-type Col-0, *cpc-2* and *CPC:CPC-like MYB-GFP* in *cpc-2* transgenic plants ( $n=5$ ). No trichome formation was observed on two-week-old third leaves in *CPC:CPC-GFP* in *cpc-2*, *CPC:ETC1-GFP* in *cpc-2* or *CPC:CPL3-GFP* in *cpc-2* (shown in panel C). (C) Scale bars: 500  $\mu$ m. p-values between the wild-type Col-0 and the transgenic lines were given above the boxes.

A

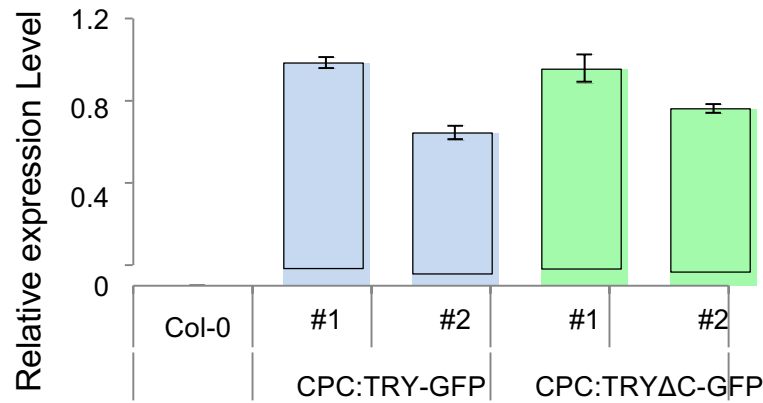

B

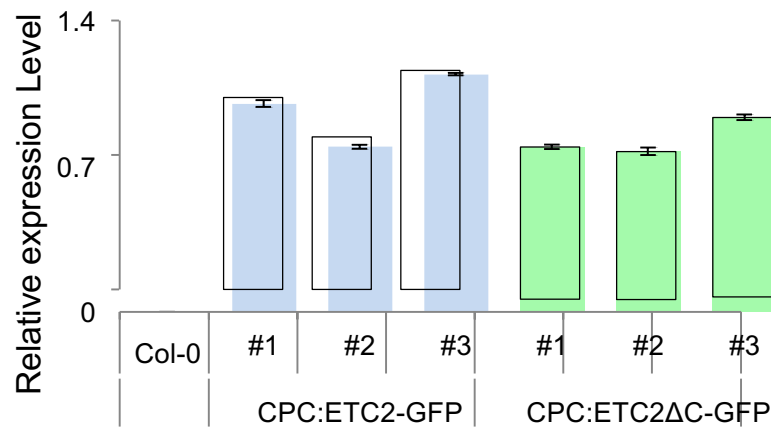

**Fig. S3. Analyses for mRNA levels of the *GFP* gene in *CPC:TRYΔC-GFP* and *CPC:ETC2ΔC-GFP* transgenic plants.**

Real-time RT-PCR of *GFP* in the wild-type Col-0, *CPC:TRY-GFP*, *CPC:TRYΔC-GFP*, *CPC:ETC2-GFP* and *CPC:ETC2ΔC-GFP*. The mRNA levels of *GFP* relative to *CPC:TRY-GFP*, *CPC:TRYΔC-GFP*, *CPC:ETC2-GFP* and *CPC:ETC2ΔC-GFP* were normalized to *Act2* expression. (A) Relative mRNA levels were calculated as the mRNA levels of each *GFP* gene relative to *CPC:TRY-GFP* (#1). (B) Relative mRNA levels were calculated as the expression levels of each *GFP* gene relative to *CPC:ETC2-GFP* (#1). Error bars indicate SDs,  $n=3$ .

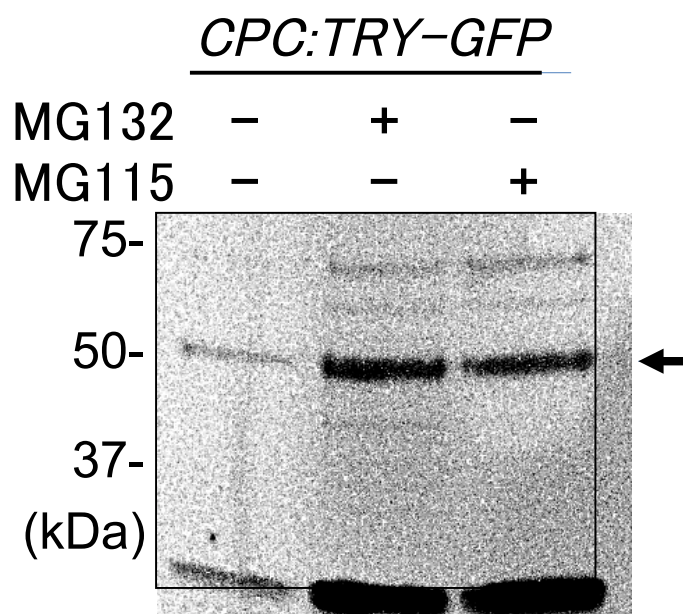

**Fig. S4. Effect of MG132 and MG115 treatment on TRY-GFP protein.**

Five-day-old seedlings of *CPC:TRY-GFP* transgenic plants were incubated with (+) or without (-) 50 $\mu$ M MG132 or 10 $\mu$ M MG115 (24 hr). The TRY-GFP fusion protein was detected on the immunoblot with an anti-GFP antibody, as indicated by the arrow. Molecular weights are shown on the left. Each lane was loaded with 20  $\mu$ g of total protein.

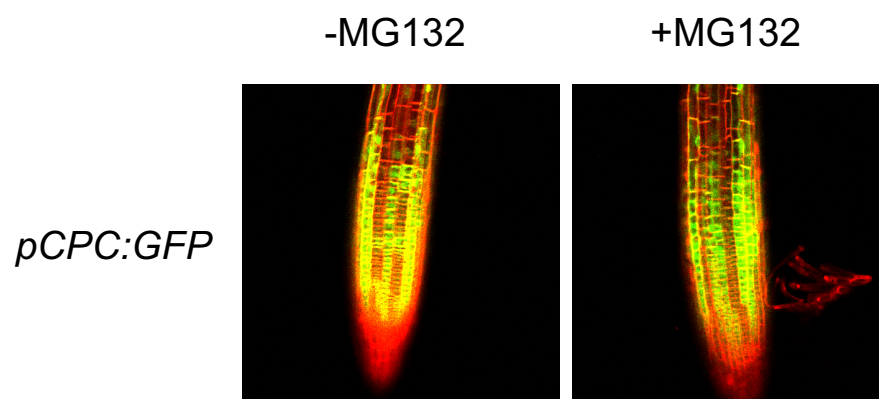

**Fig. S5. Effects of MG132 on *CPC:GFP*.**

Fluorescence images of roots expressing *CPC:GFP* five-day-old seedlings were treated with MG132 or mock-treated with 0.1% DMSO for 6 hr. Photographs were taken at the same magnification.
